# Supplementary material for: Constraint and Contingency in Multifunctional Gene Regulatory Circuits
Source: PLOS journal article supplement (doi:10.1371/journal.pcbi.1003071), 2013-06-06
Supplement: S15 (10.1371/journal.pcbi.1003071.s015) [file journal.pcbi.1003071.s015]

301 Moved Permanently

# Moved Permanently

The document has moved here.

---

Apache Server at www.ploscompbiol.org Port 80
